# Supplementary material
Source: publisher site journal article supplement (http://spandidos-publications.com/5901/downloadSupplementary)

Figure S1. Serum RvD1 at admission and discharge was not related to hospital stay in patients with AIS. Correlation of serum RvD1 at (A) admission and (B) discharge with hospital stay in patients with AIS. RvD1, resolvin D1; AIS, acute ischemic stroke.

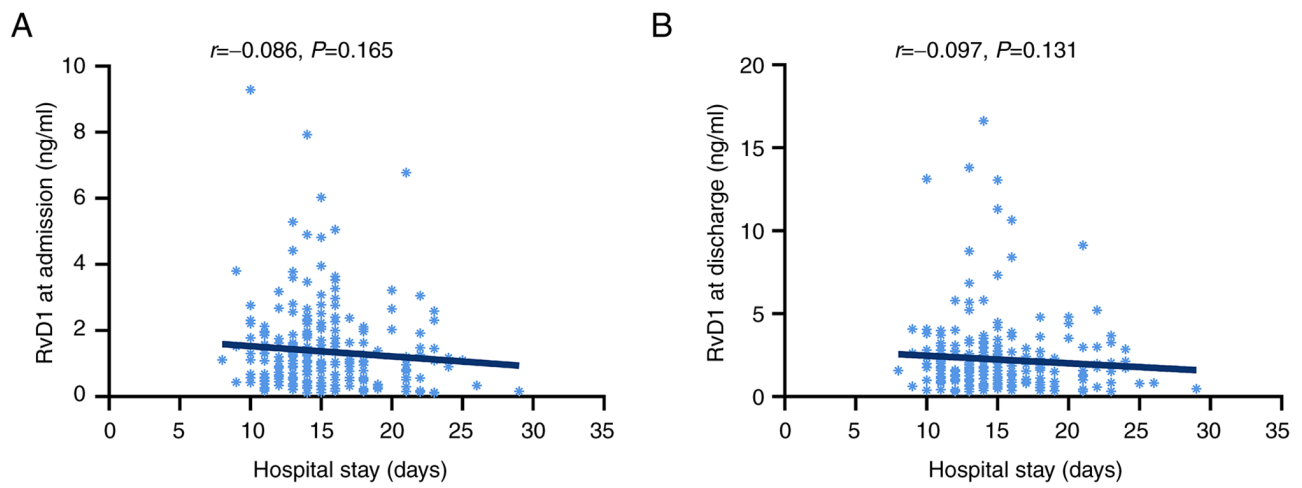

Supplement: Supplementary file 1 [file downloadSupplementary]
